# Supplementary material for: Identification and serological responses to a novel Plasmodium vivax merozoite surface protein 1 (PvMSP-1) derived synthetic peptide: a putative biomarker for malaria exposure
Source: PeerJ. 2024 Jun 25;12:e17632. doi: 10.7717/peerj.17632 (PMC11212635; doi:10.7717/peerj.17632)
Supplement: Supplemental Information 4 — Each data point indicates the spot intensity of each peptide quantitatively measured by densitometry scanning analysis using the software Image J –Protein Array Analyzer plug-in (http://image.bio.methods.free.fr/ImageJ/?Protein-Array-Analyzer-for-ImageJ.html). [file peerj-12-17632-s004.xlsx]

## Sheet: PvMSP-1
Peptides	P. vivax	P. falciparum	Healthy donors
21	16565	3334	1604
22	2664	18742	2939
23	14107	0	3609
24	10907	0	1129
25	18691	1211	1252
26	26244	12385	11393
27	1568	949	1258
28	31579	8534	1101
29	14823	4371	2595
30	12388	0	0
31	3155	398	5908
32	26084	15427	12615
33	27023	15143	12483
34	7551	44219	1542
35	23469	18753	9977
36	5708	5868	0
37	0	2669	0
38	12969	34008	0
39	2239	38247	0
40	18003	33514	0
41	8994	5536	0
42	30101	15362	1212
43	29775	15312	11769
44	27671	14034	11825
45	734	9663	952
46	0	4081	2657
47	4298	2351	1604
48	0	0	0
49	2483	0	0
50	14006	0	0
51	8014	0	0
52	0	0	0
53	11211	5764	3741
54	2057	3447	407
55	0	0	0
56	23469	0	0
57	11685	0	0
58	12795	2416	539
59	12048	0	421
60	9236	0	0
61	23006	15969	5908
62	37093	24402	18873
63	0	0	0
64	8832	6213	4674
65	32632	30685	37199
66	11989	6104	4823
67	7534	2348	1289
68	19155	7963	5893
69	12171	0	0
70	30888	0	0
71	50604	14312	12345
72	47354	7815	6884
73	28773	12607	10901
74	41972	20837	17604
75	18149	6416	4427
76	0	0	0
77	12876	5795	3415
78	11702	0	0
79	4421	0	0
80	28199	14607	8474
81	31267	15081	8573
82	35924	18497	12604
83	41817	9	3679
84	18893	4385	1688
85	30155	7295	4323
86	59559	2466	20452
87	15542	4969	3337
88	33455	12056	10255
89	22523	4975	5025
90	26163	5955	5317
91	0	0	5908
92	6756	0	522
93	0	0	0
94	2753	0	0
95	4728	0	0
96	0	0	0
97	4669	0	0
98	0	0	0
99	0	0	0
100	0	0	0
101	0	0	0
102	0	0	0
103	0	0	0
104	0	0	0
105	0	0	0
106	0	0	0
107	0	0	0
108	0	0	0
109	0	0	0
110	0	0	0
111	9034	0	0
112	5913	0	0
113	29944	19747	12157
114	2893	17598	1066
115	9593	4767	3477
116	7843	0	764
117	24402	8438	8907
118	18287	1306	1528
119	13469	0	0
120	27264	10778	7724
121	0	0	0
122	0	0	0
123	18646	8514	4081
124	12413	3449	904
125	9573	0	0
126	7188	0	0
127	2918	9803	5809
128	19292	0	0
129	22082	8694	496
130	6455	1716	0
131	13492	5174	2868
132	2753	0	0
133	0	0	0
134	21309	0	0
135	4316	0	0
136	33037	0	0
137	35761	0	0
138	18287	6562	1435
139	14711	0	0
140	36576	16152	10595
141	6657	0	0
142	37944	2227	14396
143	25643	7272	3443
144	17115	4983	0
145	3655	0	0
146	5379	0	0
147	1293	0	0
148	14758	0	0
149	23955	0	0
150	37598	15118	9949
151	0	0	0
152	0	0	0
153	0	0	0
154	5719	0	0
155	0	0	0
156	0	0	0
157	17073	1874	601
158	19424	6334	4134
159	11764	0	0
160	1899	1441	134
161	0	865	0
162	0	0	0
163	3857	0	0
164	0	0	0
165	0	0	0
166	6567	143	0
167	4284	0	0
168	10832	0	0
169	5295	0	0
170	0	0	0
171	0	0	0
172	1123	3801	303
173	27208	21452	13935
174	24753	18579	9505
175	13017	6534	2309
176	30719	19837	14932
177	18683	1989	1977
178	30848	7477	6309
179	37261	12829	1182
180	49326	25933	21193
181	6624	0	0
182	0	0	0
183	20107	8657	2966
184	10868	0	0
185	10348	0	0
186	31514	809	4064
187	19461	0	0
188	0	0	0
189	22649	16722	3966
190	26902	10343	6272
191	18253	3022	994
192	11289	0	0
193	3028	0	0
194	0	0	0
195	1334	0	0
196	2511	0	0
197	4073	463	0
198	34671	19095	14629
199	33854	17146	10817
200	2191	3008	0
201	50256	34626	23747
202	29584	12565	4688
203	14851	11219	13047
204	0	0	233
205	11714	0	1393
206	17989	3045	6118
207	36329	17587	17758
208	32537	5545	7946
209	21817	3399	3929
210	18896	0	0
211	37773	20643	15163
212	0	0	0
213	0	0	0
214	25888	3736	2556
215	0	0	0
216	29896	3028	1452
217	2736	11638	6109
218	17185	0	0
219	29301	0	0
220	711	0	0
221	41764	19522	13868
222	14584	0	0
223	13624	3472	1559
224	11273	0	0
225	7405	0	0
226	0	0	0
227	8112	0	0
228	4798	0	0
229	25486	9154	8831
230	20042	7683	7151
231	43494	24233	21222
232	22323	14764	10612
233	26643	16834	11148
234	25879	1632	10424
235	38135	28475	20567
236	34854	22837	15087
237	20157	5166	2261
238	19461	1138	1491
239	39742	10705	10803
240	41006	16593	16491
241	19447	7674	4556
242	0	503	0
243	2742	899	0
244	1972	0	0
245	14472	0	0
246	21037	2466	269
247	22348	6885	91
248	3492	1306	0
249	14913	2604	0
250	12978	0	0
251	0	0	0
252	35306	13902	1255
253	13402	902	41
254	7506	0	0
255	12975	0	0
256	22261	7916	6275
257	3739	0	0
258	8107	3621	212
259	7317	0	0
260	3039	2663	264
261	0	0	0
262	0	0	0
263	0	1591	0
264	0	686	0
265	3523	22784	233
266	0	0	0
267	0	34722	0
268	5879	23587	0
269	14464	12298	0
270	9652	0	0
271	5837	0	0
272	16955	0	0
273	7559	0	0
274	8416	0	0
275	641	0	0
276	2385	0	0
277	1899	8112	0
278	0	768	0
279	0	6913	0
280	0	0	0
281	3458	0	0
282	1636	0	0
283	0	0	0
284	0	0	0
285	0	0	0
286	1107	0	0
287	0	0	0
288	0	0	0
289	0	0	0
290	0	0	0
291	0	0	0
292	0	0	0
293	0	0	0
294	0	0	0
295	5492	0	0
296	2284	2916	137
297	0	0	0
298	4343	0	663
299	28694	23669	34289
300	28441	1607	16561
301	11826	316	1494
302	21573	4621	2795
303	28556	11756	641
304	19764	7697	0
305	24615	24166	0
306	3693	26801	9648
307	1309	0	0
308	6879	0	0
309	9351	325	604
310	24244	17826	5418
311	3534	0	3525
312	7587	0	0
313	15079	0	0
314	57340	0	0
315	3792	0	592
316	0	0	0
317	0	0	0
318	0	0	0
319	0	0	0
320	507	0	0
321	7933	0	0
322	4927	0	0
323	12629	0	0
324	3351	0	0
325	0	0	0
326	33795	17764	11171
327	5351	1059	0
328	38534	14497	11668
329	34621	11972	9497
330	18087	2508	1494
331	34475	14062	10452
332	10511	4961	3092
333	8795	3292	963
334	5017	317	345
335	3373	13242	1007
336	18944	6008	3295
337	9053	2604	935
338	686	4351	955
339	1683	148	34
340	0	0	0
341	0	0	0
342	0	0	0
343	0	0	0
344	2615	0	0
345	1919	0	0
346	0	0	0
347	0	0	0
348	17708	10975	0
349	23767	13289	2949
350	1139	9688	786
351	1073	0	0
352	5893	0	0
353	11559	0	0
354	1685	0	0
355	0	0	0
356	6952	0	0
357	18023	9559	7219
358	0	0	0
359	10475	3239	3011
360	30773	0	0
361	19638	0	0
362	13722	5983	2845
363	0	0	0
364	1379	0	0
365	35258	9716	7713
366	1441	0	0
367	36705	13191	11868
368	6202	2593	1132
369	3562	0	0
370	18076	5466	0
371	43615	21994	20151
372	15711	4618	3087
373	26219	4624	4362
374	1448	1315	1575
375	44907	18303	19685
376	35753	17225	15674
377	16163	6354	4741
378	33211	17121	15615
379	40702	27284	2448
380	31567	1989	1698
381	31817	17118	1473
382	22787	13742	9755
383	42132	28008	223
384	29907	14736	9092
385	28096	17517	13932
386	16214	7008	3592
387	23688	1366	9741
388	16744	5536	687
389	11452	6348	5691
390	0	0	1241
391	1693	7056	3449
392	12376	5803	3564
393	36955	19303	14525
394	2014	1843	1078
395	25236	291	2887
396	32618	1489	797
397	21225	1256	19
398	45447	19801	15921
399	16419	0	0
400	39413	15587	14379
401	40933	20053	17486
402	26222	11604	10047
403	2586	10388	1005
404	20284	0	0
405	18593	3806	4435
406	39916	18022	16952
407	0	0	0
408	0	0	0
409	0	0	0
410	0	0	0
411	0	0	0
412	2536	15688	10783
413	1148	489	2795
414	19851	12444	873
415	105	7081	3216
416	23725	15536	10851
417	0	0	0
418	6	0	13
419	13382	0	0
420	4902	0	157
421	11306	0	179
422	8913	4733	1356
423	0	0	0
424	31921	14351	11618
425	11424	0	0
426	41303	18595	15604
427	27744	932	7921
428	26705	2548	0
429	34537	15522	11384
430	19357	14579	5755
431	34775	14388	1107
432	4258	1152	0
433	15837	601	0
434	32767	0	0
435	27534	4396	4963
436	2171	0	0
437	1966	2947	0
438	25876	6076	0
439	13494	0	0
440	0	0	0
441	0	0	0
442	0	0	0
443	0	0	0
444	0	0	0
445	0	0	0
446	0	0	0
447	0	0	0
448	0	0	0
449	2846	0	0
450	0	0	519
451	0	0	0
452	0	0	14
453	0	0	0
454	0	0	0
455	0	0	0
456	5475	0	0
457	35368	17312	13519
458	0	0	0
459	9899	0	0
460	964	0	0
461	6514	0	0
462	59	0	0
463	1483	0	0
464	0	0	0
465	0	0	0
466	11385	0	0
467	5483	0	0
468	10607	0	0
469	12801	0	0
470	11312	0	351
471	0	0	0
472	5663	0	0
473	19615	0	0
474	9486	0	0
475	9697	0	0
476	46449	8927	6508
477	27624	0	0
478	46688	14107	16227
479	37351	20407	18792
480	30365	18848	14702
481	20778	9879	4587
482	13865	5933	3514
483	22941	8815	4247
484	25101	4663	1109
485	20714	4416	0
486	31537	8758	7022
487	53747	3161	27887
488	34691	15261	12561
489	8	0	0
490	32801	6652	5202
491	20289	0	0
492	1366	1222	0
493	16896	3786	1533
494	211	0	0
495	8539	0	0
496	1361	0	0
497	37778	18379	15474
498	4523	0	0
499	18801	4874	1297
500	67438	29433	2475
501	59773	13669	7233
502	74365	27219	18634
503	32905	16916	9618
504	56556	14674	7151
505	1405	0	0
506	1832	0	0
507	3511	0	0
508	0	0	0
509	0	0	0
510	4396	3003	893
511	0	0	0
512	16832	9039	4472
513	3964	0	0
514	38938	25292	2121
515	38059	25486	19761
516	5677	0	0
517	734	0	0
518	46534	28104	20865
519	23149	0	0
520	50067	31056	27559
521	0	0	887
522	5562	0	553
523	0	0	0
524	39843	19663	16165
525	15758	0	0
526	48669	27683	24758
527	21868	0	0
528	44008	23107	16778
529	11194	0	137
530	1091	0	0
531	42059	26365	15098
532	32604	0	0
533	11073	0	0
534	33902	19062	8045
535	19289	0	9
536	0	0	16
537	46053	27848	21963
538	2484	8935	5834
539	46702	36747	42654
540	26781	6593	5179
541	38919	0	0
542	38337	0	505
543	50994	31317	26764
544	12098	0	1443
545	4584	24236	2091
546	20155	0	281
547	19989	0	233
548	43626	22059	17165
549	6952	4461	2269
550	40795	25486	22679
551	4009	26542	22401
552	23778	1089	9413
553	4888	722	0
554	28969	3253	3396
555	87275	15989	16915
556	43298	20073	19623
557	19705	315	1677
558	24214	561	4474
559	16551	4191	0
560	1566	0	0
561	6407	4913	0
562	77829	5149	0
563	9938	0	0
564	8902	0	0
565	41528	38211	41207
566	4003	0	184
567	7655	0	1584
568	1118	0	2278
569	38031	34477	39137
570	10214	2624	1848
571	0	0	0
572	28624	8258	4297
573	36587	29511	37356
574	0	0	1736
575	21949	0	2828
576	37295	18949	18224
577	14093	10697	18533
578	2907	0	856
579	43618	43517	49314
580	0	0	1191
581	0	0	261
582	0	2511	509
583	6219	0	0
584	14157	5334	8991
585	0	0	0
586	26685	10556	10202
587	42447	24067	33146
588	37924	20567	21429
589	0	0	0
590	4407	0	0
591	18773	0	0
592	37275	35388	34064
593	8284	3789	1545
594	8778	327	0
595	8576	3806	1236
596	13514	4674	246
597	10031	0	3
598	23947	6671	2528
599	31758	24612	29429
600	20657	0	148

## Sheet: Block 1
Peptides	P. vivax	P. falciparum	Healthy donor
21	16565	3334	1604
22	2664	18742	2939
23	14107	0	3609
24	10907	0	1129
25	18691	1211	1252
26	26244	12385	11393
27	1568	949	1258
28	31579	8534	1101
29	14823	4371	2595
30	12388	0	0
31	3155	398	5908
32	26084	15427	12615
33	27023	15143	12483
34	7551	44219	1542
35	23469	18753	9977
36	5708	5868	0
37	0	2669	0
38	12969	34008	0
39	2239	38247	0
40	18003	33514	0
41	8994	5536	0
42	30101	15362	1212
43	29775	15312	11769
44	27671	14034	11825
45	734	9663	952
46	0	4081	2657
47	4298	2351	1604
48	0	0	0
49	2483	0	0
50	14006	0	0
51	8014	0	0
52	0	0	0
53	11211	5764	3741
54	2057	3447	407
55	0	0	0
56	23469	0	0
57	11685	0	0
58	12795	2416	539
59	12048	0	421
60	9236	0	0
61	23006	15969	5908
62	37093	24402	18873
63	0	0	0
64	8832	6213	4674
65	32632	30685	37199
66	11989	6104	4823
67	7534	2348	1289
68	19155	7963	5893
69	12171	0	0
70	30888	0	0
71	50604	14312	12345
72	47354	7815	6884
73	28773	12607	10901
74	41972	20837	17604
75	18149	6416	4427
76	0	0	0
77	12876	5795	3415
78	11702	0	0
79	4421	0	0
80	28199	14607	8474
81	31267	15081	8573
82	35924	18497	12604
83	41817	9	3679
84	18893	4385	1688

## Sheet: Blocok 2
Peptides	P. vivax	P. falciparum	Healthy donor
85	30155	7295	4323
86	59559	2466	20452
87	15542	4969	3337
88	33455	12056	10255
89	22523	4975	5025
90	26163	5955	5317
91	0	0	5908
92	6756	0	522
93	0	0	0
94	2753	0	0
95	4728	0	0
96	0	0	0
97	4669	0	0
98	0	0	0
99	0	0	0
100	0	0	0
101	0	0	0
102	0	0	0
103	0	0	0
104	0	0	0
105	0	0	0
106	0	0	0
107	0	0	0
108	0	0	0
109	0	0	0
110	0	0	0
111	9034	0	0
112	5913	0	0
113	29944	19747	12157
114	2893	17598	1066
115	9593	4767	3477
116	7843	0	764
117	24402	8438	8907
118	18287	1306	1528
119	13469	0	0
120	27264	10778	7724
121	0	0	0
122	0	0	0

## Sheet: Block 3
Peptides	P. vivax	P. falciparum	Healthy donor
123	18646	8514	4081
124	12413	3449	904
125	9573	0	0
126	7188	0	0
127	2918	9803	5809
128	19292	0	0
129	22082	8694	496
130	6455	1716	0
131	13492	5174	2868

## Sheet: Block 4
Peptides	P. vivax	P. falciparum	Healthy donor
132	2753	0	0
133	0	0	0
134	21309	0	0
135	4316	0	0
136	33037	0	0
137	35761	0	0
138	18287	6562	1435
139	14711	0	0
140	36576	16152	10595
141	6657	0	0
142	37944	2227	14396
143	25643	7272	3443
144	17115	4983	0

## Sheet: Block 5
Peptides	P. vivax	P. falciparum	Healthy donor
145	3655	0	0
146	5379	0	0
147	1293	0	0
148	14758	0	0
149	23955	0	0
150	37598	15118	9949
151	0	0	0
152	0	0	0
153	0	0	0
154	5719	0	0
155	0	0	0
156	0	0	0
157	17073	1874	601
158	19424	6334	4134
159	11764	0	0
160	1899	1441	134
161	0	865	0
162	0	0	0
163	3857	0	0
164	0	0	0
165	0	0	0
166	6567	143	0
167	4284	0	0
168	10832	0	0
169	5295	0	0
170	0	0	0
171	0	0	0
172	1123	3801	303
173	27208	21452	13935
174	24753	18579	9505
175	13017	6534	2309
176	30719	19837	14932
177	18683	1989	1977
178	30848	7477	6309
179	37261	12829	1182
180	49326	25933	21193
181	6624	0	0
182	0	0	0
183	20107	8657	2966
184	10868	0	0
185	10348	0	0
186	31514	809	4064
187	19461	0	0
188	0	0	0
189	22649	16722	3966
190	26902	10343	6272
191	18253	3022	994
192	11289	0	0
193	3028	0	0
194	0	0	0
195	1334	0	0
196	2511	0	0
197	4073	463	0
198	34671	19095	14629
199	33854	17146	10817
200	2191	3008	0
201	50256	34626	23747
202	29584	12565	4688
203	14851	11219	13047
204	0	0	233
205	11714	0	1393
206	17989	3045	6118
207	36329	17587	17758
208	32537	5545	7946
209	21817	3399	3929
210	18896	0	0
211	37773	20643	15163
212	0	0	0
213	0	0	0
214	25888	3736	2556
215	0	0	0
216	29896	3028	1452
217	2736	11638	6109
218	17185	0	0
219	29301	0	0
220	711	0	0
221	41764	19522	13868
222	14584	0	0
223	13624	3472	1559
224	11273	0	0
225	7405	0	0
226	0	0	0
227	8112	0	0
228	4798	0	0
229	25486	9154	8831
230	20042	7683	7151
231	43494	24233	21222
232	22323	14764	10612
233	26643	16834	11148
234	25879	1632	10424
235	38135	28475	20567
236	34854	22837	15087
237	20157	5166	2261
238	19461	1138	1491
239	39742	10705	10803
240	41006	16593	16491
241	19447	7674	4556
242	0	503	0
243	2742	899	0
244	1972	0	0
245	14472	0	0
246	21037	2466	269
247	22348	6885	91
248	3492	1306	0
249	14913	2604	0
250	12978	0	0
251	0	0	0
252	35306	13902	1255
253	13402	902	41
254	7506	0	0
255	12975	0	0
256	22261	7916	6275
257	3739	0	0
258	8107	3621	212

## Sheet: Block 6
Peptides	P. vivax	P. falciparum	Healthy donor
259	7317	0	0
260	3039	2663	264
261	0	0	0
262	0	0	0
263	0	1591	0
264	0	686	0
265	3523	22784	233
266	0	0	0
267	0	34722	0
268	5879	23587	0
269	14464	12298	0
270	9652	0	0
271	5837	0	0
272	16955	0	0
273	7559	0	0
274	8416	0	0
275	641	0	0
276	2385	0	0
277	1899	8112	0
278	0	768	0
279	0	6913	0
280	0	0	0
281	3458	0	0
282	1636	0	0
283	0	0	0
284	0	0	0
285	0	0	0
286	1107	0	0
287	0	0	0
288	0	0	0
289	0	0	0
290	0	0	0
291	0	0	0
292	0	0	0
293	0	0	0
294	0	0	0
295	5492	0	0

## Sheet: Block 7
Peptides	P. vivax	P. falciparum	Healthy donor
296	2284	2916	137
297	0	0	0
298	4343	0	663
299	28694	23669	34289
300	28441	1607	16561
301	11826	316	1494
302	21573	4621	2795
303	28556	11756	641
304	19764	7697	0
305	24615	24166	0
306	3693	26801	9648
307	1309	0	0
308	6879	0	0
309	9351	325	604
310	24244	17826	5418
311	3534	0	3525
312	7587	0	0
313	15079	0	0
314	5734	0	0
315	3792	0	592
316	0	0	0
317	0	0	0
318	0	0	0
319	0	0	0
320	507	0	0
321	7933	0	0
322	4927	0	0
323	12629	0	0
324	3351	0	0
325	0	0	0
326	33795	17764	11171
327	5351	1059	0
328	38534	14497	11668
329	34621	11972	9497
330	18087	2508	1494
331	34475	14062	10452
332	10511	4961	3092
333	8795	3292	963
334	5017	317	345
335	3373	13242	1007
336	18944	6008	3295
337	9053	2604	935
338	686	4351	955
339	1683	148	34

## Sheet: Block 8
Peptides	P. vivax	P. falciparum	Healthy donor
340	0	0	0
341	0	0	0
342	0	0	0
343	0	0	0
344	2615	0	0
345	1919	0	0
346	0	0	0
347	0	0	0
348	17708	10975	0
349	23767	13289	2949
350	1139	9688	786
351	1073	0	0
352	5893	0	0
353	11559	0	0
354	1685	0	0
355	0	0	0
356	6952	0	0
357	18023	9559	7219
358	0	0	0
359	10475	3239	3011
360	30773	0	0
361	19638	0	0
362	13722	5983	2845

## Sheet: Block 9
Peptides	P. vivax	P. falciparum	Healthy donor
363	0	0	0
364	1379	0	0
365	35258	9716	7713
366	1441	0	0
367	36705	13191	11868
368	6202	2593	1132
369	3562	0	0
370	18076	5466	0
371	43615	21994	20151
372	15711	4618	3087
373	26219	4624	4362
374	1448	1315	1575
375	44907	18303	19685
376	35753	17225	15674
377	16163	6354	4741
378	33211	17121	15615
379	40702	27284	2448
380	31567	1989	1698
381	31817	17118	1473
382	22787	13742	9755
383	42132	28008	223
384	29907	14736	9092
385	28096	17517	13932
386	16214	7008	3592
387	23688	1366	9741
388	16744	5536	687
389	11452	6348	5691
390	0	0	1241
391	1693	7056	3449
392	12376	5803	3564
393	36955	19303	14525
394	2014	1843	1078
395	25236	291	2887
396	32618	1489	797
397	21225	1256	19
398	45447	19801	15921
399	16419	0	0
400	39413	15587	14379
401	40933	20053	17486
402	26222	11604	10047
403	2586	10388	1005
404	20284	0	0
405	18593	3806	4435
406	39916	18022	16952
407	0	0	0
408	0	0	0
409	0	0	0
410	0	0	0
411	0	0	0
412	2536	15688	10783
413	1148	489	2795
414	19851	12444	873
415	105	7081	3216
416	23725	15536	10851
417	0	0	0
418	6	0	13
419	13382	0	0
420	4902	0	157
421	11306	0	179
422	8913	4733	1356
423	0	0	0
424	31921	14351	11618
425	11424	0	0
426	41303	18595	15604
427	27744	932	7921
428	26705	2548	0
429	34537	15522	11384
430	19357	14579	5755
431	34775	14388	1107
432	4258	1152	0
433	15837	601	0
434	32767	0	0
435	27534	4396	4963
436	2171	0	0
437	1966	2947	0
438	25876	6076	0
439	13494	0	0
440	0	0	0
441	0	0	0
442	0	0	0

[truncated: 4 more sheets: Block 10, Block 11, Block 12, Block 13]
