# Supplementary material for: Identification and serological responses to a novel Plasmodium vivax merozoite surface protein 1 (PvMSP-1) derived synthetic peptide: a putative biomarker for malaria exposure
Source: PeerJ. 2024 Jun 25;12:e17632. doi: 10.7717/peerj.17632 (PMC11212635; doi:10.7717/peerj.17632)
Supplement: Supplemental Information 5 — IgG responses to p70 and p314 results were expressed as reactivity index (RI). IgG subclasses to p314 were measured and expressed as RI. [file peerj-12-17632-s005.xlsx]

## Sheet: P. vivax
Sample identification	Peptide 314					Peptide 70	Region	Country	Age	Sex	Number Previous Episodes	Fever	Chill	Headache	Myalgia	Epigastric pain	Nausea	Vomit	Parasitemia	Hemoglobin	Hematocrit
	RI total IgG	RI IgG1	RI IgG2	RI IgG3	RI IgG4	RI total IgG
1028	2.56	4.38	1.22	6.26	1.01	0.97	Cuiabá	Brazil	4	1	13	1	1	1	1	1	1	1	5400	15	46	NA= Not applicable
1032	1.32	1.92	0.61	4.41	0.98	0.56	Cuiabá	Brazil	32	1	8	1	1	1	1	1	1	1	9050	8.4	25
1123	1.39	1.80	0.77	3.3	0.99	1.10	Cuiabá	Brazil	31	2	4	1	1	1	1	1	0	0	NA	9.2	27.2
1155	2.78	1.39	1.27	5.38	0.92	1.42	Cuiabá	Brazil	49	1	2	1	1	1	1	1	1	1	15780	9.8	28
1168	1.39	2.24	0.64	2.44	0.94	0.76	Cuiabá	Brazil	36	1	0	1	1	1	1	1	1	1	NA	16.6	48.5
1172	1.27	2.32	0.44	4.26	0.92	0.55	Cuiabá	Brazil	25	1	20	1	1	1	1	1	1	1	NA	16.1	47.9
1175	1.62					0.67	Cuiabá	Brazil	21	1	3	1	1	1	1	1	1	1	10625	10	29.3
1225	1.23	1.87	1.02	3.63	0.83	0.89	Cuiabá	Brazil	30	1	3	1	1	1	1	1	1	1	1075	15.7	46
1247	1.22	0.64	0.4	2.65	0.84	1.23	Cuiabá	Brazil	18	1	1	1	1	1	1	1	1	1	55357	8.3	23.4
1326	1.79		2.1			0.71	Cuiabá	Brazil	48	1	0	1	1	0	0	0	0	0	8238	7.6	21
1328	1.19	1.08	1.08	1.19	0.93	0.99	Cuiabá	Brazil	64	1	1	10	1	0	1	1	0	0	1115	12.1	34
1329	2.75	2.1	0.56	0.97	1.01	0.72	Cuiabá	Brazil	31	1	1	1	1	0	1	0	1	1	1246	13.2	37
1330	2.40	0.65	1.05	2.32	0.96	1.77	Cuiabá	Brazil		1	1	2	1	1	1	1	0	0	865
1332	1.77	0.97	0.68	0.99	0.99	0.8	Cuiabá	Brazil	50	1	1	1	1	1	1	1	1	1	7620	12.9	36
1333	1.66	1.54	0.74	3.71	1.03	1.14	Cuiabá	Brazil	22	2	2	2	1	1	1	1	0	1	2879	13.4	38
1334	2.51	1.4	0.86	0.99	0.97	0.67	Cuiabá	Brazil	39	1	1	0	1	1	1	1	0	0	28	15.1	43
1335	3.03	1.34	1.21	2.81	1.06	1.71	Cuiabá	Brazil	25	1	1	1	1	0	1	1	0	1	3158	12	34
1337	0.27	1.17	0.44	0.97	0.93	0.96	Cuiabá	Brazil	44	1	1	1	1	1	1	1	1	1	3410	13.7	39
1404	3.11	0.75	0.73	0.85	0.9	0.65	Cuiabá	Brazil	18	1	2	1	1	1	1	1	1	1	1850	13.3	39.3
1405	0.81	1.69	0.94	4.33	0.96	1.09	Cuiabá	Brazil	47	1	3	1	1	1	1	0	0	0	1350	12.3	38.6
1409	2.51	0.67	1.13	1.27	0.95	1.04	Cuiabá	Brazil	59	1	13	1	1	1	1	1	0	0	7298	15.9	44.8
1410	2.29	0.93	1.53	1.69	1.01	0.85	Cuiabá	Brazil	56	2	1	1	1	1	0	0	1	1	1650
1411	3.55	1.44	0.75	4.85	1.05	1.48	Cuiabá	Brazil	32	2	3	1	1	1	1	1	1	1	1069
1416	1.97	0.84	0.65	0.71	0.98	0.7	Cuiabá	Brazil	39	1	0	1	0	1	1	0	0	1	1578	12.5	36.1
1418	1.87	1.01	1.01	1.02	0.93	0.94	Cuiabá	Brazil	29	1	8	1	1	1	0	1	1	1	1676	13.2	38.7
1419		2.14	1.05	4.33	0.9	0.66	Cuiabá	Brazil	69	1	1		1	1	1	1	1	1	11000	15.1	45.1
1420	1.43	0.88	0.93	0.62	0.88	0.71	Cuiabá	Brazil	66	1	3	0	1	0	0	0	0	0	2400	15.1	43.2
1423	2.46	1.25	1.03	1.43	0.81	0.64	Cuiabá	Brazil	25	1	10	1	1	1	1	0	0	0	1778	13.6	39.2
1426	2.36		0.28			0.8	Cuiabá	Brazil	45	1	15	1	1	1	1	0	0	0	8615	15.5	44.4
1428	2.21	1.17	0.79	1.3	0.87	0.78	Cuiabá	Brazil	65	1	3	1	1	0	0	1	0	0	219	12.1	34.6
1429	1.82	0.77		1.53	0.86	0.9	Cuiabá	Brazil	50	1	50	1	1	1	1	0	0	0	635	13.5	38.7
1440	2.24	2.27	0.69	3.36	0.82	1.04	Cuiabá	Brazil	57	2	0	1	1	1	1	1	1	1	NA	9	27.1
1441	1.35	0.66	0.47	0.58	0.82	1.42	Cuiabá	Brazil	51	1		1	1	1	1	1	1	1	14575	17.9	51.6
1455	1.19	0.95	0.54	0.78	0.84	0.92	Cuiabá	Brazil	27	2		1	1	1	1	0	1	1	NA	11.5	35.3
1464	1.1	0.41	0.46	1.21	0.83	1.24	Cuiabá	Brazil	38	1	50	1	0	0	1	0	0	0	30
1467	1.39	0.97	0.74	1.52	0.81	0.53	Cuiabá	Brazil	60	1		1	1	0	1	0	0	0	1435	14.1	42.1
1472	2.01	0.6	0.48	0.95	0.93	2.03	Cuiabá	Brazil	47	2	1	1	1	1	1	1	1	1	1475	12.4	36.4
1474	0.98	1.34	1.08	3.61	0.88	0.9	Cuiabá	Brazil	45	1	5	1	1	1	0	0	0	0	79	14	40.7
1477	3.33	5	0.94	5.35	0.86		Cuiabá	Brazil	48	2		1	1	1	1	0	1	1	2810	12.8	37.9
1480	3.16	0.83	0.37	0.67	0.84	0.43	Cuiabá	Brazil	33	2	3	1	1	1	1	0	0	0	16	13.8	39.3
1481	1.45	1.96	0.88	3.9	0.84	0.63	Cuiabá	Brazil	27	1	5	1	1	1	1	0	0	0	6276	13.9	41.5
1483	1.83	2.13	1.09	4.98	0.84	1.29	Cuiabá	Brazil	36	2	5	0	0	0	0	0	0	0	1318	12.4	39.6
1487	2.17	0.69	0.54	0.63	0.85	0.86	Cuiabá	Brazil	22	1		1	1	1	1	1	1	1	1830	13.7	43.2
1492	2.83	0.8	0.6	1.67	0.89	1.03	Cuiabá	Brazil	40	1	4	1	1	1	1	0	0	0	NA	13.9	41.1
1493	1.63	1.02	0.72	1.7	0.91	1.03	Cuiabá	Brazil	35	2	5	1	0	1	0	0	0	0	NA	11.9	37
1497	1.94		0.79	3.41	0.89	0.58	Cuiabá	Brazil		1	0	1	1	1	1	0	0	1	NA	16.5	48.4
1499	3.3	1.21	0.5	0.95	0.86	0.98	Cuiabá	Brazil		1	5	1	0	1	1	0	0	0	106333	15.5	46.6
1501	0.93		0.74	0.91	0.89	1.42	Cuiabá	Brazil		1	4	1	1	1	1	1	1	1	NA	13.6	40
1503	5.72	2.81	1.4	5.88	0.92		Cuiabá	Brazil		1		1	1	0	1	0	1	1	5630
1505	1.71	0.55	1.03	0.54	0.85	0.9	Cuiabá	Brazil	40	1	5	1	1	1	0	0	1	1	3220	14.7	43.7
1507	0.82	1.13	0.45	1.61	0.89	1.75	Cuiabá	Brazil	52	1	0	1	1	1	0	0	0	0	2819	11.5	35
1510	0.75	0.51	0.56	0.39	0.91	1.01	Cuiabá	Brazil	54	1	5	1	1	1	1	0	1	1	2830	14.6	44.1
1512	2.18	1.62	0.51	1.14	0.91	0.5	Cuiabá	Brazil	48	1	3	1	1	1	1	0	1	0	4353	14.3	42.6
1514	1.65	1.16	0.34	1.19	0.92		Cuiabá	Brazil	47	1	5	1	1	1	1	0	0	0	878	12.6	38.4
1688	3.08		0.8	4.34	0.84	1.11	Cuiabá	Brazil	33	2	1	1	1	1	1	1	1	1	NA	7.4	21.6
1692	1.23	2.86	0.71	6.03	0.85	0.89	Cuiabá	Brazil	38	1	3	1	1	1	1	1	1	1	7500	9.3	26.2
1705	0.58	0.86	0.58	1.41	0.87	0.59	Cuiabá	Brazil	22	1	8	1	1	1	1	1	1	1	2375	16.1	46.1
1708			0.63		0.81	0.66	Cuiabá	Brazil	53	1	0	1	1	1	1	1	1	1	7500	15.2	46.4
1721	3.09	0.63	0.93	3.52	0.94	0.62	Cuiabá	Brazil	42	1		1	1	1	1	1	1	1	NA	18.5	63.1
1751	1.07	1.4	0.75	2.76	0.86	0.71	Cuiabá	Brazil	30	1	0	1	1	1	1	1	1	1	138	15.4	45.7
1780	1.04	0.71	0.76	1.26	0.84	0.79	Cuiabá	Brazil	24	1	30	1	1	0	1	1	0	0	282	16.8	46.4
1799	0.81	0.59	0.41	0.36	0.84	0.5	Cuiabá	Brazil	33	1	4	1	1	1	1	1	1	1	750	17.1	47.4
1805	0.54	0.44	1.05	0.76	0.88	0.96	Cuiabá	Brazil	34	2	20	1	1	1	1	1	1	1	5	8.5	25.4
1808			0.76			0.95	Cuiabá	Brazil	39	1	0	1	1	1	1	1	1	1	1	16.9	49.5
1812			1.6		0.81		Cuiabá	Brazil	42	1	0	1	1	1	1	1	1	1	3150	17.5	50.1
1821	0.98	0.59	0.6	0.93	0.84	1.25	Cuiabá	Brazil	24	1	0	1	1	1	1	1	1	1	NA	16.4	45.5
1841			0.71		0.86	0.99	Cuiabá	Brazil				1	1	1	1	1	1	1	NA	4.5	16.8
1853			1.06		0.86	0.69	Cuiabá	Brazil	28	1	0	1	1	1	1	1	1	1	650	16.2	47.5
1866			0.97		0.82	1.21	Cuiabá	Brazil	27	1	1	1	1	1	1	1	1	1	1600	15.8	46
1866	1.2				0.82	1.1	Cuiabá	Brazil	28	2	0	1	1	1	1	1	1	1	10500	7.1	20.7
1890	0.64	0.53	0.63	0.65	0.89	1.58	Cuiabá	Brazil	23	1	10	1	1	1	1	1	0	0	3000	15.8	46.1
1903	0.63	0.49	0.42	0.49	0.99	0.9	Cuiabá	Brazil	19	1	0	1	1	1	1	1	1	1	11	15.7	47.8
1905	1.61	0.85	0.64	1.52	1.05	0.97	Cuiabá	Brazil	32	1	2	0	0	0	1	0	0	0	465	16.2	47
1906	0.68	1.96	0.62	1.95	0.97	0.83	Cuiabá	Brazil	5	1	3	1	1	1	1	1	1	1	12000	2.4	29.1
1915	1.11	0.72	0.6	1.17	0.94	0.63	Cuiabá	Brazil	28	1	11	1	1	1	1	1	1	1	124	14.9	45.2
1926	0.64	0.49	0.47	0.49	0.93	1.62	Cuiabá	Brazil											NA
1927		0.76	0.59	1.64	0.87	0.94	Cuiabá	Brazil	32	2									NA	8.1	25.8
1931	1.68	0.92	1.19	0.39	1.08	1.08	Cuiabá	Brazil	57	1	1	1	1	1	1	1	1	1	5500	10.1	29.2
1946		0.53	0.621	0.78	0.94	1.43	Cuiabá	Brazil	57	1	14	1	1	1	1	1	1	1	6600	16.2	45.6
1955	2.14	0.53	0.69	0.69	1	1.66	Cuiabá	Brazil	43	1	4	1	1	1	1	0	0	0	9000	16.4	46.3
1973		0.66	0.58	0.74	1	0.72	Cuiabá	Brazil	48	1	10	1	1	1	1	1	0	0	950	16.9	48
1974	1.37	1.01	0.67	0.8	0.94	1.85	Cuiabá	Brazil	25	1	0	1	1	1	1	1	1	1	6500	15.7	45.2
1978		0.63	0.51	1.47	0.96	0.59	Cuiabá	Brazil	30	1	7	1	1	1	1	1	1	1	25	14.6	45.4
1991		0.91	0.6	2.06	0.94	0.75	Cuiabá	Brazil	47	1		0	0	0			0	0	NA	15.1	46.1
1999	0.68	0.36	1.18	1.88	0.93	0.7	Cuiabá	Brazil	29	2	0	1	1	1	1	1	1	1	2000	8.5	24.8
2006	0.69	0.43	1.12	2.06	0.95	1.01	Cuiabá	Brazil	48	2	3	1	1	1	1	1	1	1	1400	9.1	28.9
2028	2.37		0.65	1.21	1.07	1.58	Cuiabá	Brazil	56	1	2	1	1	1	1	1	1	1	15350	16.1	46.9
2059	1.31	1.02	1	1.85	1.34	1.45	Cuiabá	Brazil	27	1	5	1	1	1	1	1	1	1	5160	9.7	29.1
2105	2.85		0.56	1.08	0.95		Cuiabá	Brazil	55	1		0	0	1	0	0	0	0	NA	16.1	45.9
2117	3.15	0.44	0.73	1.19	0.97	1.6	Cuiabá	Brazil	63	1	1	1	1	1	1	0	1	0	400	16.5	49.8
2174	0.93	0.71		1.4	0.97	0.61	Cuiabá	Brazil	27	1	4	1	1	1	1	0	0	0	20500	15.3	47.5
2198	0.64	0.4	0.59	0.56	0.94	1.21	Cuiabá	Brazil	36	1	3	1	1	1	1	1	0	0	150	15.8	45.6
2199	3.14	1.06	0.7	3.34	1.04	0.89	Cuiabá	Brazil	54	2	7		0	0	0	0	1	0	1333	13.8	45.8
2200	6.32	3.14	1.02	4.18	1.05	0.96	Cuiabá	Brazil	59	2	1		0	0	0	0	0	0	11700	12.3	39.3
2201	1.86	4.36	1.47	5.5	1.06	1.11	Cuiabá	Brazil	61	1	1		1	0	0	1	0	0	8600	11.7	36.3
2202	1.12	2.84	1.19	2.53	0.98	1.25	Cuiabá	Brazil	17	1	7		1	0	1	0	0	0	NA	14.5	45.8
2203	2.23	5.49	0.64	6.05	0.93	0.62	Cuiabá	Brazil	35	2	2		1	1	1	1	1	1	2737	12	38
2204	0.75	1.83	0.92	2.08	0.95	0.87	Cuiabá	Brazil	15	1	0		1	1	1	1	1	1	248	13.6	42
2205	2.02	2.78	1.19	4.25	0.9	0.43	Cuiabá	Brazil	51	1	15		0	1	0	1	0	1	1872	13.9	42.7
2206	2.64	2.74	1.29	2.55	0.96	0.58	Cuiabá	Brazil	37	1	1		0	0	1	1	0	1	NA	15.1	48.2
2207	1.65	2.48	0.84	3.93	0.91	0.51	Cuiabá	Brazil	45	2	0		1	1	1	1	1	1	2024	14.2	44.1
2240	0.92		0.94	0.75	0.92	0.62	Cuiabá	Brazil	42	1	1		1	1	1	1	1	1	6667	15.8	46.9
2241	2.92	2.79	1.25	3.78	0.91	1.59	Cuiabá	Brazil	44	2	10		1	1	1	1	1	1	4608	12.4	38
2242	1.68	2.33	1.24	3.68	0.91	1.07	Cuiabá	Brazil	32	2	5		1	1	1	1	0	1	NA	10.3	32.5
2243	2.17	4	2.79	6.66	0.97	0.97	Cuiabá	Brazil	28	1	3		1	1	1	1	0	1	NA	14	45.4
2244	1.63	3.68	0.74	4.6	0.87	1.1	Cuiabá	Brazil	33	1	5		1	1	1	1	0	0	NA	15	45.6
2245	1.73	2.28	1.53	3.6	0.93	0.5	Cuiabá	Brazil	50	1	2		1	1	1	1	0	1	5402	13.1	39.9
2246	2.03	5.04	1.07	3.74	0.95	1.66	Cuiabá	Brazil	29	1	1		1	1	1	1	1	0	2584	13	40.4
2247	1.83		1.24			0.61	Cuiabá	Brazil	21	1	1		1	1	1	1	1	1	3276	15.4	47.4
2248	1.85	2.77		4.02	0.93	0.89	Cuiabá	Brazil	27	1	6		0	0	1	1	0	1	19320	12.9	38.9
2249	1.84	3.2	1.62	5.8	0.91	0.69	Cuiabá	Brazil	46	1	2		1	1	0	1	0	0	12194	12.5	40.4
2250	1.45	0.64	1.44	0.8	0.91	1.28	Cuiabá	Brazil	20	1	0		1	1	1	1	1	1	9520	12.1	37.2
2251	1.02	4.97	0.69	5.81	0.9	0.89	Cuiabá	Brazil	18	2	2		1	1	1	1	0	0	2989	11.3	35.6
2280	1.03		1.15	0.8	0.89	0.84	Cuiabá	Brazil	57	1	5		0	0	0	1	0	1	7684	12.6	39.4
2281	0.9		1.58	0.91	0.99	0.77	Cuiabá	Brazil	19	1	9		1	1	1	0	0	1	800	14.7	45.4
2282	1.04		0.84	0.51	0.94	1.62	Cuiabá	Brazil	64	1			1	1	1	1	0	1	5278	12.1	35.6
2283	1.01		1.75	1.76	0.91	1.01	Cuiabá	Brazil	41	2	2		1	1	1	1	1	0	8520	12.5	37.9
2284	0.74		1.36	1.05	0.93	0.87	Cuiabá	Brazil	48	1	1		1	0	1	1	1	0	1408	12.7	39.3
2285	1.68	2.9	0.72	2.98	1.05	1.24	Cuiabá	Brazil	67	1	2		1	1	1	1	0	0	1224	12.5	37
2286	2.18		0.7	1.33	1.02		Cuiabá	Brazil	31	1	1		1	1	1	1	1	0	954	14.6	44.2
2287	1.95		0.99	1.99	1	1.16	Cuiabá	Brazil	18	1	0		1	1	1	1	1	1	6741	11.3	34.5
2288	2.7		1.01	2.27	0.96	0.69	Cuiabá	Brazil	50	1	1		1	1	1	1	1	0	5412	12.6	37.9
2289	4.22		1.51	1.83	1.01	0.66	Cuiabá	Brazil	15	2	0		1	0	0	1	0	0	2940	12.9	39.5
3010	1.03	2.09	0.83	2.68	0.91	1.22	Cuiabá	Brazil	15	2	0		1	0	1	1	1	1	540	14.5	44.7
3011	0.98		1.65			0.77	Cuiabá	Brazil	45	1	3		1	0	1	1	0	0	10143	11.9	36
3012	0.85	1.66	0.91	2.32	0.97	1.65	Cuiabá	Brazil	52	1	0		1	1	1	1	0	0	900	15.2	44.9
3013	3.6		0.69	6.55	0.99	0.82	Cuiabá	Brazil	28	1	1		1	1	1	1	0	1	NA	14.1	41.6
3014	0.96		0.58	0.37	0.94	0.25	Cuiabá	Brazil	38	2	0	1	1	1	1	0	0	1	4653	13	39.9
3015	1.39	3.86	1.05	2.57	0.93	0.59	Cuiabá	Brazil	20	1	1	1	1	1	1	0	0	1	21150	13.2	41
3016	2.46	6.67	1	7.42	1.02	0.48	Cuiabá	Brazil	29	1	2	1	1	1	1	1	0	1	4941	9.7	30.7
3017	0.95	1.54	1.11	2.63	1.03	1.2	Cuiabá	Brazil	27	2	3	1	1	1	1	1	0	1	6664	13	40.3
3018	0.86		1.04		0.94	0.76	Cuiabá	Brazil	31	1	1	1	1	1	1	1	0	0	1152	14.9	45
3055	1.7	2.64	1.34	2.06	0.86	0.73	Cuiabá	Brazil	68	2	0	1	1	1	1	1	1	0	8740	10.7	33.7
3056	1.57	0.39	0.65	0.75	0.95	1.39	Cuiabá	Brazil	46	1	3	1	1	1	1	1	1	1	4752	16.1	47.6
3057	1.76		0.79	3.75	0.88	0.94	Cuiabá	Brazil	44	2	3	1	1	1	1	1	0	1	2814	12.7	39.5
3058	0.92		0.72	0.57	0.89	1.84	Cuiabá	Brazil	24	1	0	1	1	1	1	1	1	1	3430	15	45.1
3059	2.58	2.28	1.86	4.85	0.94	0.98	Cuiabá	Brazil	59	2	50	1	1	1	1	1	1	1	2324	12.6	38.3
3060	1.24	3.39	1.03	6.52	0.91	1.05	Cuiabá	Brazil	31	1	0	1	1	1	1	1	1	1	5304	10.8	33.6
3061	1.75		0.88	1.43	0.81	0.99	Cuiabá	Brazil	40	2	50	1	1	1	1	0	0	1	NA	13.2	40.7
3062	1.34		0.53	0.43	0.82	1.27	Cuiabá	Brazil	33	1	1	1	1	1	1	0	1	1	498	16.6	50.8
3063	3.28	0.48	0.83	2.43	0.93	0.78	Cuiabá	Brazil	48	1	8	1	1	0	1	1	0	0	5940	14.7	45.8
3390	1.21	2.15	0.71	1.48	0.95	1.97	Cuiabá	Brazil											1640	11	35.3
3391	2.43	5.8	0.82	6.55	0.92	0.83	Cuiabá	Brazil	48	2	2	1	1	1	1	0	1	1	6240	11.3	35.2
3392	1.47	2.41	0.93	4.59	0.85	0.64	Cuiabá	Brazil	37	1	0	1	1	1	1	1	1	0	960	14.3	41
3393	4.58		0.79	0.73	0.87	0.62	Cuiabá	Brazil	29	2	2	1	1	1	1	1	0	0	1830	12.1	36.9
3394	1.53		0.22	0.55	0.86	2.04	Cuiabá	Brazil	23	1	0	1	1	0	1	1	1	1	1440	14.9	45.7
3395	2.66		0.84		0.82	1.18	Cuiabá	Brazil	16	1	0	1	1	1	1	1	1	0	342	14.4	44.1
3396	0.57	1.61		3.5	0.84	1.92	Cuiabá	Brazil	14	1	0	1	1	1	1	0	0	0	3807	14.5	46.1
3397	0.87	1.51	1.19	3.11	0.85	1.59	Cuiabá	Brazil	21	2	0	1	1	1	1	1	1	0	126	12.5	38.1
3455	2.88		0.83	1.4	0.88	1.07	Cuiabá	Brazil	49	1	30	0	0	0	0	0	0	0	2208	13.3	40.9
3456	1.2	2.70	1.83	4.95	0.9	1.9	Cuiabá	Brazil	54	1	5	1	1	1	1	0	1	0	3577	13.2	42.3
3457	3.39	4.26	0.93	3.95	0.82	0.91	Cuiabá	Brazil	34	1	6	0	1	1	1	1	0	0	5925	13.9	41.2
3458	2.09		0.72	5.54	0.88	0.96	Cuiabá	Brazil	48	1	1	1	1	0	0	0	0	0	5925	13.7	42
3459	8	0.80	1.56	3.58	0.89	1.03	Cuiabá	Brazil	44	2	4	1	1	1	1	1	1	0	6708	11.1	35.7
3460	2.04		0.75	1.04	0.82	1.22	Cuiabá	Brazil	29	1	5	1	1	1	1	0	0	0	1100	15.9	46.6

## Sheet: P. falciparum
Sample identification	Peptide 314					Peptide 70	Region	Country	Age	Sex	Number Previous Episodes	Fever	Chill	Headache	Myalgia	Nausea	Parasitemia	Hemoglobin	Hematocrit
	RI Total IgG	RI IgG1	RI IgG2	RI IgG3	RI IgG4	RI total IgG
1725	0.73	0.55	0.85	0.65	0.83	0.23	Cuiabá	Brazil	33	2	0	1	1	1	1	1	5000	9.7	28.9
1782	0.53	0.57	0.55	0.81	0.94	0.36	Cuiabá	Brazil	57	1	2	0	0	1	1	0	1500	14	41.1
1852	0.47	0.52	0.49	1.10	0.87	1.23	Cuiabá	Brazil	36	1	10	1	1	1	1	1	56000	10.2	32.2
1960	0.77	0.92	0.76	0.79	0.85	0.49	Cuiabá	Brazil	41	2	0	1	1	0	1	1	3950	13.5	39.2
1961	0.62	0.68	0.86	0.74	0.79	0.45	Cuiabá	Brazil	67	1	8	0	1	1	1	1	500
1962	0.76	0.90	0.79	0.64	0.86	1.19	Cuiabá	Brazil	31	1	30	0	1	1	1	1	2.5
1963	0.60	0.77	0.55	0.83	0.85	0.11	Cuiabá	Brazil	33	1	1	1	0	1	1	1	50
2021	0.74	0.47	0.60	0.66	0.82	0.22	Cuiabá	Brazil	37	2	5	0	1	1	1	1	500	12.8	37
2022	0.32	0.67	0.61	0.78	0.80	0.20	Cuiabá	Brazil	38	1	15	0	1	1	1	1	50	15.4	48.8
2023	0.28	0.47		0.84			Cuiabá	Brazil	47	2	30	0	1	1	1	1	5	14.3	39.4
2024	0.50	0.56		0.55			Cuiabá	Brazil	22	1	0	1	1	1	1	1	5
2025	0.17	0.66		0.88			Cuiabá	Brazil	45	1	10	0	1	1	1	1	5
2026	0.44	0.58		0.84			Cuiabá	Brazil	40	1	40	1	1	1	1	1	50
2027	0.35	0.45					Cuiabá	Brazil	22	1	2	1	1	1	1	1	50
2028	0.28	0.72					Cuiabá	Brazil	46	2	12	0	1	1	1	1	5

## Sheet: Healthy donor
Sample identification	Peptide 314					Peptide 70
	RI IgG T	RI IgG1	RI IgG2	RI IgG3	RI IgG4	RI total IgG
HD 01	0.85	0.84	0.5	0.79	1	0.402
HD 02	1.09	0.66		0.88	0.98	0.28
HD 03	0.74	0.7	0.6	0.96	1.04	0.28
HD 04	0.97	0.79	0.72	0.61	1.1	0.65
HD 05	0.95	0.71		0.79		0.22
HD 06	0.72	0.65	0.62	0.43	1.07	0.41
HD 07	1.22	0.61	0.38	0.62	0.9	0.21
HD 08	0.7	0.73	0.79	0.58	0.86	0.35
HD 09	0.52		0.95	0.86		0.29
HD 10	0.26	0.8	1.06	0.49	0.99	0.2
HD 12	0.74	0.86	0.89	0.79	0.97	0.06
HD 13	0.77		0.75	0.65	0.9	0.34
HD 14	0.81	0.75		0.85		0.29
HD 15	0.8	0.61	0.758974	0.81	0.91
HD 16	1.03		0.95	0.62	0.9	0.21
HD 17	0.9	0.64	1.1	1.1	1.13	0.42
HD 18	0.71	0.62		0.56	0.9	0.33
HD 19	0.94	0.82		0.63	0.92	0.17
HD 20	0.65	0.65		0.9	0.91	0.11
HD 21	0.74	0.5	0.39	0.89	0.98	0.16
HD 22	0.56	0.76	0.57	0.75	0.95	0.4
HD 23	0.57	1.45	0.69	0.63	0.93	0.18
HD 24	0.79	0.56	0.67	0.53	0.93	0.39
HD 25	1.03	0.36	0.45	0.56	0.94	0.16
HD 26	0.77		0.74	0.59	0.94	0.24
HD 27	0.87		0.371154	0.78	0.97	0.23
HD 28	0.63	1.52	0.46	0.58	0.97	0.14
HD 29	0.86	0.64	0.46	0.58	0.96	0.1
HD 30	1.11	0.28	0.53		1.02	0.13
HD 31	0.29	0.29	0.52		0.9	0.11
HD 32	0.52	0.28	0.5		0.88	0.12035
HD 33	0.77	0.28	0.66		1	0.18
HD 34	0.44	0.4	0.56		0.9	0.28
HD 35	0.61	0.28	0.65		0.99	0.21
HD 36	0.77	0.29	0.48		0.91	0.16
HD 37	0.24	0.27	0.41			0.12
